# Supplementary material for: Evaluating the impact of needs assessment models on autistic children’s participation in the habilitation process: protocol for a prospective observational study
Source: BMJ Open. 2024 Nov 1;14(10):e089135. doi: 10.1136/bmjopen-2024-089135 (PMC11529756; doi:10.1136/bmjopen-2024-089135)
Supplement: online supplemental file 1 [file bmjopen-14-10-s001.pdf]

## Appendix 1. Informed consent materials

Translations from the original consent forms in Swedish.

Children's form:

---

### Consent to participate in the project: Participation of autistic children and adolescents in the habilitation process

I have received oral and/or written information about the project and have had the opportunity to ask questions. I get to keep the written information..

I agree to participate in the project and to my personal data being processed as described in the research person information.

|                |                       |
|----------------|-----------------------|
| Place and date | The child's signature |
|                | Name clarification    |

After signing, post the form in the enclosed reply envelope.

Parent's form:

---

## Consent to participate in the project: Participation of autistic children and adolescents in the habilitation process

I/we have received written information about the project and have had the opportunity to ask questions. I/we may retain the written information.

I/we agree that I/we and \_\_\_\_\_ (child's name) and date of birth \_\_\_\_\_ are included in the project and that information about me/us and my/our child is processed in the manner described in the research person information.

Address: \_\_\_\_\_  
\_\_\_\_\_

Telephone: \_\_\_\_\_

If you are two parents/guradians, both must sign

|                |                    |
|----------------|--------------------|
| Place and date | Signature parent 1 |
|                | Name clarification |
| Place and date | Signature parent 2 |
|                | Name clarification |

After signing, post the form in the enclosed reply envelope.

Staff's form:

---

**Consent to participate in the project:**  
**Participation of autistic children and adolescents in the habilitation**  
**process**

I have received oral and written information about the project and have had the opportunity to ask questions. I may retain the written information.

I agree to participate in the project and to my personal data being processed as described in the research person information.

Address: \_\_\_\_\_  
\_\_\_\_\_

Telephone: \_\_\_\_\_

|                |                    |
|----------------|--------------------|
| Place and date | Signature          |
|                | Name clarification |

After signing, post the form in the enclosed reply envelope.
